# Supplementary material for: Structure and dimensionality of coordination complexes correlated to piperazine conformation: from discrete [CuII2] and [CuII4] complexes to a μ1,3-N3− bridged [CuII2]n chain
Source: Royal Society of Chemistry journal article supplement (doi:10.1039/b814681k), 2009-01-01
Supplement: b814681k.pdf [file b814681k.pdf]

## Structure and Dimensionality of Coordination Complexes Correlated to Piperazine Conformation: From Discrete $[\text{Cu}^{\text{II}}_2]$ and $[\text{Cu}^{\text{II}}_4]$ Complexes to a $\mu_{1,3}\text{-N}_3^-$ Bridged $[\text{Cu}^{\text{II}}_2]_n$ Chain

Alok Ranjan Paital,<sup>a</sup> Debashree Mandal,<sup>a</sup> Xiaoying Huang,<sup>b</sup> Jing Li,<sup>b</sup> Guillem Aromí<sup>\*,c</sup> and Debashis Ray<sup>\*,a</sup>

<sup>a</sup>Department of Chemistry, Indian Institute of Technology, Kharagpur 721 302, India, <sup>b</sup>Department of Chemistry and Chemical Biology, Rutgers University, Piscataway, NJ-08854, USA and <sup>c</sup>Departament de Química Inorgànica, Universitat de Barcelona, Diagonal, 647 08028-Barcelona, Spain.

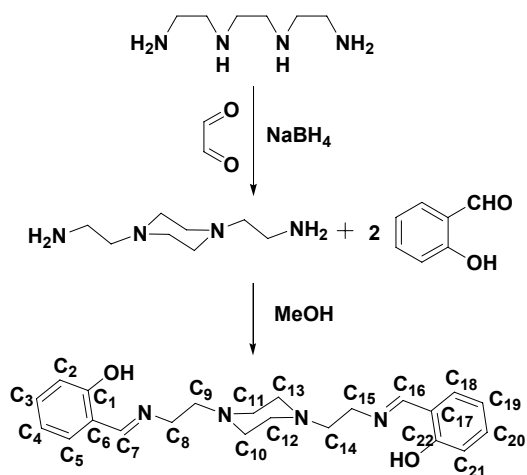

Scheme S1

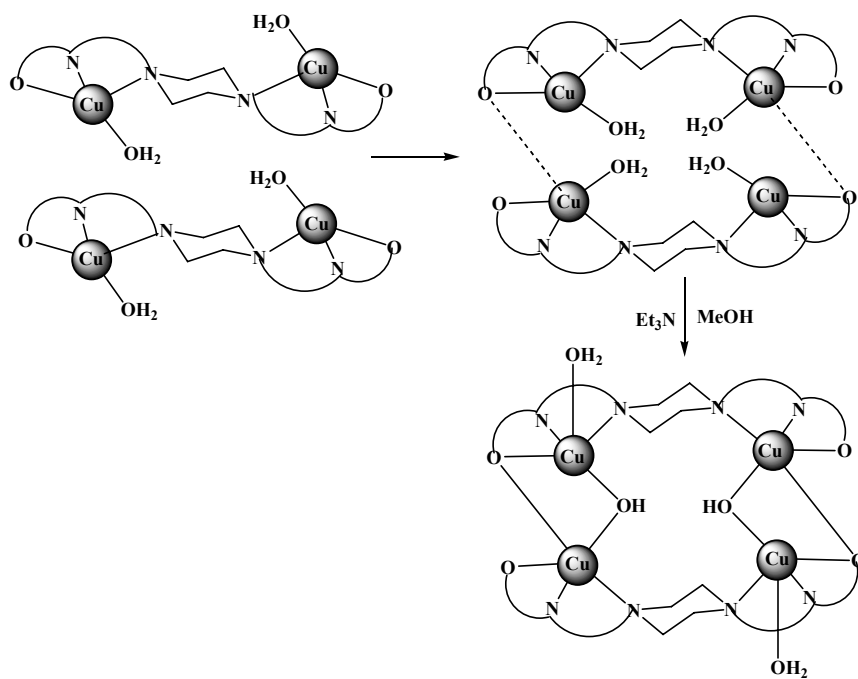

Scheme S2

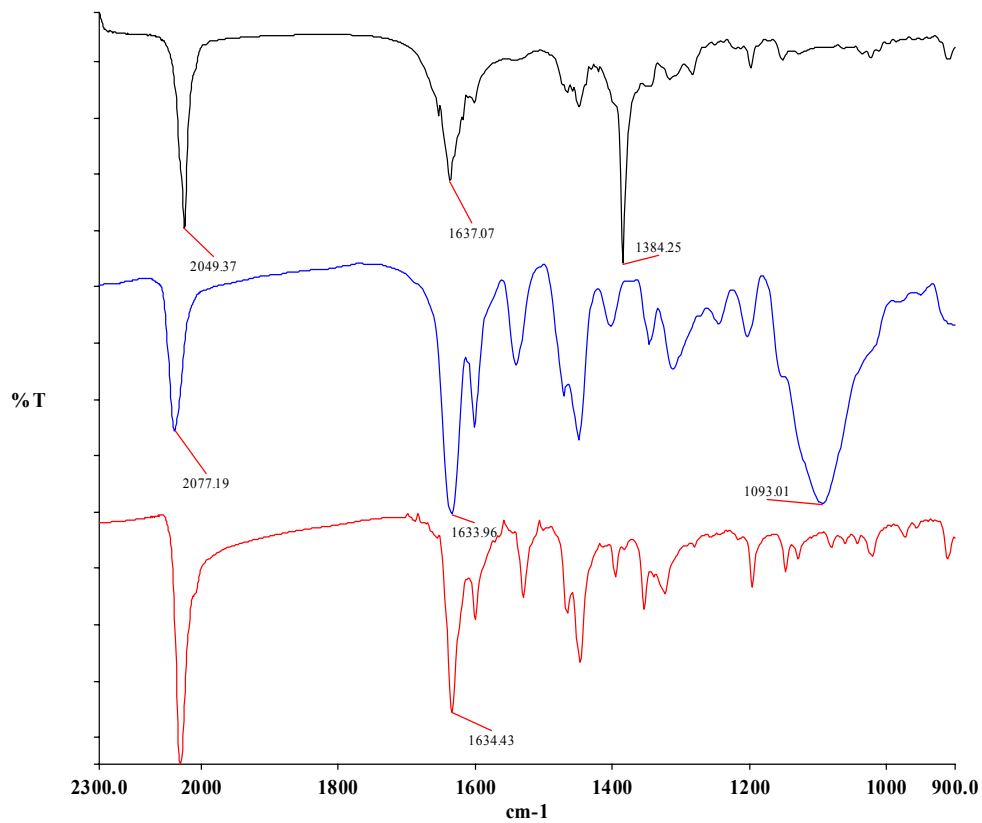

**Figure S1.** FT-IR spectra of complexes **3b** (top), **3a**(middle) and **4** (bottom).

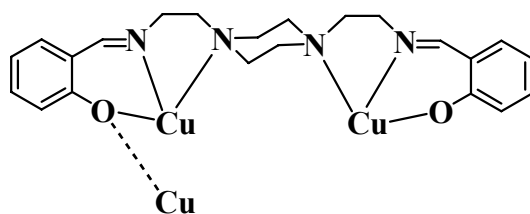

**Figure S2.** Schematic representation of the asymmetric bridging mode ( $\mu_3$ ) of ligand  $L^{2-}$  in complexes **2a** and **2b**.

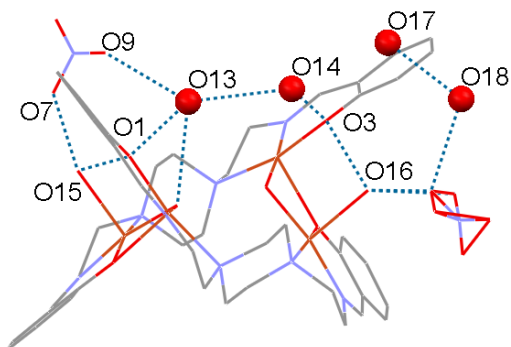

**Figure S3.** Intra- and intermolecular hydrogen bonding network exhibited by complex **2b**.

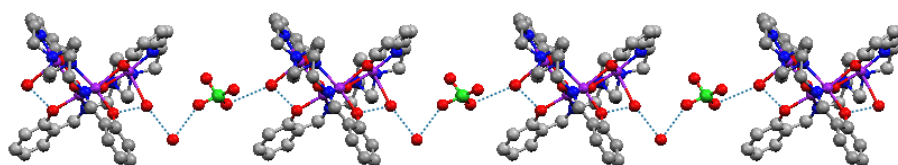

**Figure S4.** Hydrogen bonding network in **2a** viewed along the crystallographic a-axis.

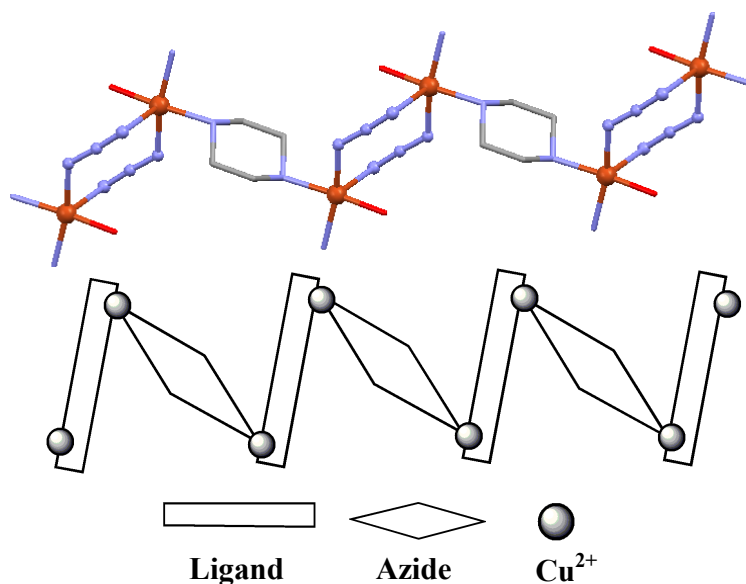

**Figure S5.** The metal to metal connectivity in **4**, achieved through azido and piperazine bridging fragments.

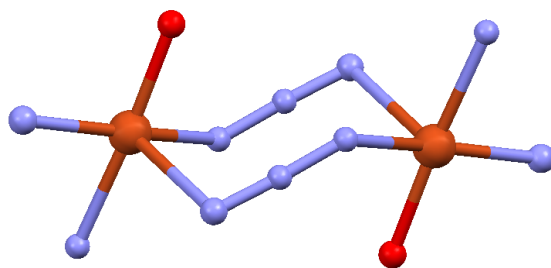

**Figure S6.** Representation of the  $[\text{Cu}(\mu\text{-N}_3)_2\text{Cu}]$  core of complex **4**, emphasizing its *chair* conformation, where six azide nitrogen atoms lie in one plane.

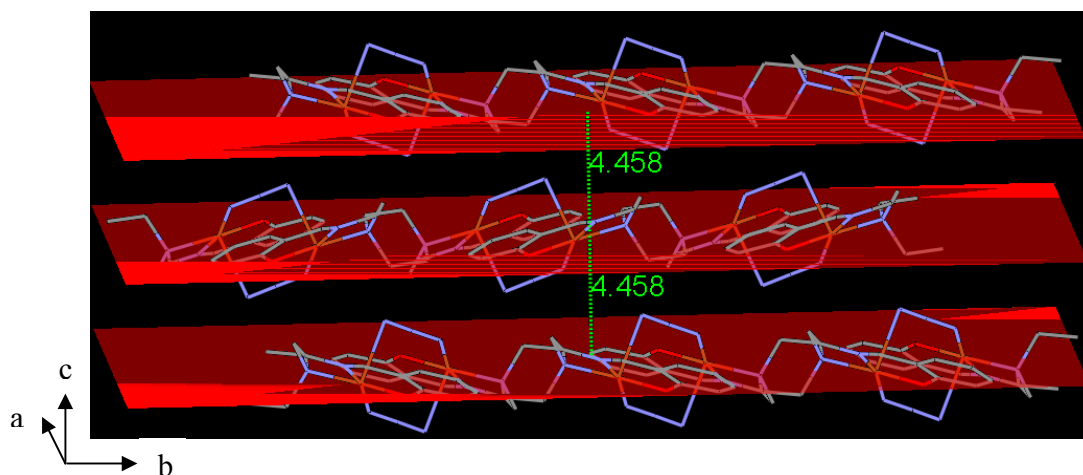

**Figure S7.** Representation of the 1D chain propagation in **4** along the crystallographic *b*-axis with an inter-planar distance of 4.458 Å.

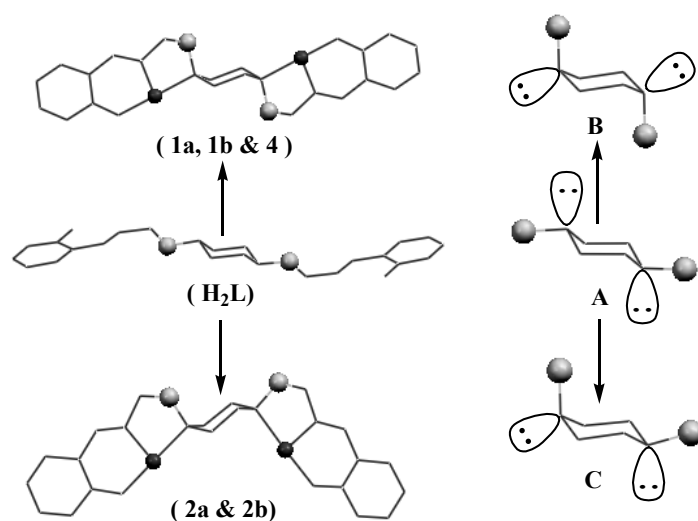

**Figure S8.** Left; molecular solid state structure of **H<sub>2</sub>L** (middle), together with that of the [Cu<sub>2</sub>L] unit of **1a/b** and **4** (top) and the analogous fragment of **2a/b** (bottom). Right; schemes of the conformation of the piperazine fragment in each compound, where the orientation of N-atom lone pairs are indicated. Grey balls = α-C atoms, black ball = Cu.
